# Supplementary material for: A molecular photosensitizer achieves a Voc of 1.24 V enabling highly efficient and stable dye-sensitized solar cells with copper(II/I)-based electrolyte
Source: PubMed Central journal article supplement (PMC7979847; doi:10.1038/s41467-021-21945-3), 2021-03-19
Supplement: 41467_2021_21945_MOESM3_ESM.pdf [file 41467_2021_21945_MOESM3_ESM.pdf]

## Solar Cells Reporting Summary

Nature Research wishes to improve the reproducibility of the work that we publish. This form is intended for publication with all accepted papers reporting the characterization of photovoltaic devices and provides structure for consistency and transparency in reporting. Some list items might not apply to an individual manuscript, but all fields must be completed for clarity.

For further information on Nature Research policies, including our [data availability policy](#), see [Authors & Referees](#).

## ▶ Experimental design

## Please check: are the following details reported in the manuscript?

## 1. Dimensions

- Area of the tested solar cells  Yes  No The laboratory sized solar cell dimension: round, diameter 0.6 cm, area 0.28 cm<sup>2</sup>. Larger area solar cells: rectangular, 0.7cm x 4.0 cm, area 2.80 cm<sup>2</sup>, as described in the Experimental Section (Fabrication of solar cells ) in the Supplementary Information.
- Method used to determine the device area  Yes  No The device areas are determined by the design of the screens for printing TiO<sub>2</sub> films, as described in the Experimental Section (Fabrication of solar cells ) in the Supplementary Information.

## 2. Current-voltage characterization

- Current density-voltage (J-V) plots in both forward and backward direction  Yes  No The J-V plots in both forward and backward direction were recorded, but not added to the publication, since we did not observe hysteresis or any other unusual behaviour during the characterization of the dye sensitized solar cells. Note that hysteresis is notorious for perovskite solar cells but is rarely seen in dye sensitized solar cells.
- Voltage scan conditions  Yes  No For instance: scan direction, speed, dwell times Voltage scan conditions: reverse scan, 125 mV/s, 80 ms, as described in the Experimental Section (Characterization of Solar Cells ) in the Supplementary Information.
- Test environment  Yes  No For instance: characterization temperature, in air or in glove box Test environment: room temperature and humidity, in air, as described in the Experimental Section (Characterization of Solar Cells ) in the Supplementary Information.
- Protocol for preconditioning of the device before its characterization  Yes  No Current-voltage characteristics were recorded in accordance with the procedure reported in the Experimental Section (Characterization of Solar Cells ) in the Supplementary Information. No specific protocol for preconditioning was applied.
- Stability of the J-V characteristic  Yes  No Verified with time evolution of the maximum power point or with the photocurrent at maximum power point; see [ref. 7](#) for details. Our DSCs are stable under light soaking conditions.

## 3. Hysteresis or any other unusual behaviour

- Description of the unusual behaviour observed during the characterization  Yes  No We did not observe hysteresis or any other unusual behaviour during the characterization of the solar cells.
- Related experimental data  Yes  No Our DSCs have no hysteresis behavior.

## 4. Efficiency

- External quantum efficiency (EQE) or incident photons to current efficiency (IPCE)  Yes  No IPCE spectra were recorded, as reported in Fig. 2a and Fig. 3a of the manuscript.
- A comparison between the integrated response under the standard reference spectrum and the response measure under the simulator  Yes  No The integrated J<sub>sc</sub> from IPCE spectra agrees well with the measured J<sub>sc</sub> from JV measurements, as detailed in the manuscript (Fig. 2a, Fig. 3a, and Table 1). The mismatch between the J<sub>sc</sub> calculated from the overlap integral of the IPCE with the standard AM1.5G emission spectrum (ASTM G173-03) and the one measured from standard AM1.5G solar simulator is very small.
- For tandem solar cells, the bias illumination and bias voltage used for each subcell  Yes  No We do not study tandem DSCs in the current work.

## 5. Calibration

- Light source and reference cell or sensor used for the characterization  Yes  No  
As described in the Experimental Section (Characterization of Solar Cells ) in the Supplementary Information, for small area solar cells (0.28 cm<sup>2</sup>): the light source was a 300-W Xenon lamp (Oriental) equipped with a SchottK113 Tempax sunlight filter (Prazisions Glas & Optik GmbH) to match the emission spectrum of the lamp to the AM1.5G standard. Before each measurement, the exact light intensity was determined using a calibrated Si reference diode equipped with an infrared cut-off filter (KG-3, Schott); For large area solar cells (2.80 cm<sup>2</sup>): indoor light sources OSRAM Warm White 930 was used and the light intensities were calibrated by the light meter (TES-1334, TES).
- Confirmation that the reference cell was calibrated and certified  Yes  No  
The Si reference diode was certified and calibrated by Newport Corporation PV Lab, Bozeman, MT, USA.
- Calculation of spectral mismatch between the reference cell and the devices under test  Yes  No  
The spectral mismatch between our simulator and the AM 1.5 solar source was insignificant as the integrated current densities estimated from the IPCE spectra were in good agreement with the values obtained from the current density-voltage (J-V) curves as detailed in the manuscript. Spectra mismatch factor of 1 was used.

## 6. Mask/aperture

- Size of the mask/aperture used during testing  Yes  No  
For small solar cells (0.28 cm<sup>2</sup>), all measurements were conducted using a non-reflective metal mask with an aperture area of 0.158 cm<sup>2</sup> to cover part of the active area of the device and avoid stray light capturing by our devices; For the larger area solar cells (2.80 cm<sup>2</sup>) under indoor illumination, the mask with rectangular areas of 3.80 cm<sup>2</sup> was used, as detailed in the Experimental Section (Characterization of Solar Cells ) in the Supplementary Information.
- Variation of the measured short-circuit current density with the mask/aperture area  Yes  No  
We haven't measured the cells with apertures of different sizes.

## 7. Performance certification

- Identity of the independent certification laboratory that confirmed the photovoltaic performance  Yes  No  
The results have not been certified yet by an independent accredited laboratory.
- A copy of any certificate(s)  
*Provide in Supplementary Information*  Yes  No  
Not applicable as we have not yet certified our devices by an independent accredited laboratory.

## 8. Statistics

- Number of solar cells tested  Yes  No  
At least 16 devices for each condition were tested.
- Statistical analysis of the device performance  Yes  No  
A statistical analysis of the performance is presented Fig. 3c.

## 9. Long-term stability analysis

- Type of analysis, bias conditions and environmental conditions  Yes  No  
We stated the long-term stability in the Experimental Section (Characterization of Solar Cells ) in the Supplementary Information.  
*For instance: illumination type, temperature, atmosphere humidity, encapsulation method, preconditioning temperature*
